# Supplementary material for: Cardiovascular Effects of Combining Subcutaneous or Intravenous Esketamine and the MAO Inhibitor Tranylcypromine for the Treatment of Depression: A Retrospective Cohort Study
Source: Springer Nature journal article supplement (doi:10.1007/s40263-021-00837-6), 2021-07-20
Supplement: MOESM1 [file 24116348]

# Supplementary material

## CNS Drugs

### **Cardiovascular effects of combining subcutaneous or intravenous esketamine and the MAO-Inhibitor tranylcypromine for the treatment of depression: A retrospective cohort study**

Vera M Ludwig<sup>1</sup>, Cathrin Sauer<sup>1</sup>, Allan H Young<sup>2,3</sup>, James Rucker<sup>2</sup>, Michael Bauer<sup>1</sup>, Hannelore Findeis<sup>1</sup>, Philipp Ritter<sup>1</sup>

<sup>1</sup>Department of Psychiatry and Psychotherapy, University Hospital Carl Gustav Carus, Technische Universität Dresden, Dresden, Germany.

<sup>2</sup>Department of Psychological Medicine, Institute of Psychiatry, Psychology and Neuroscience, King's College London, London UK.

<sup>3</sup>South London and Maudsley NHS Foundation Trust, Bethlem Royal Hospital, Monks Orchard Road, Beckenham, Kent, United Kingdom.

Corresponding author: Philipp Ritter, Email: [Philipp.Ritter@uniklinikum-dresden.de](mailto:Philipp.Ritter@uniklinikum-dresden.de)

**Table 1** Summary of the existing literature on the use of ketamine during MAOI therapy in humans

| Ref. No. | Article                 | N      | Sex            | Age                  | Diagnoses                                                                        | (Es)Ketamine dose            | MAOI daily dose                                                | Outcome                                                                                                                                                                                                                                                             |
|----------|-------------------------|--------|----------------|----------------------|----------------------------------------------------------------------------------|------------------------------|----------------------------------------------------------------|---------------------------------------------------------------------------------------------------------------------------------------------------------------------------------------------------------------------------------------------------------------------|
| 17       | Doyle 1990              | 1      | female         | 42                   | Emergency laparotomy, depression                                                 | ketamine 1,5 mg/kg IV        | tranylcypromine 20 mg                                          | No sympatomimetic crisis during anaesthetic induction with ketamine                                                                                                                                                                                                 |
| 18       | Bartova et al., 2015    | 2      | female         | 43, 74               | TRD                                                                              | esketamine 12,5–75 mg IV     | tranylcypromine 10 – 80 mg                                     | No relevant cardiovascular changes                                                                                                                                                                                                                                  |
| 20       | Katz et al., 2018       | 2<br>3 | male<br>female | 60, 71<br>26, 55, 62 | Major depressive episode with and without psychotic features, bipolar depression | ketamine 0,5 mg/kg IV        | tranylcypromine 10 – 60 mg, phenelzine 45 mg, selegeline 12 mg | All patients showed increases in average BP and HR after ketamine administration, however, these were not deemed clinically significant. One patient with a history of cardiovascular comorbidities experienced transient, asymptomatic BP increases up to 180/110. |
| 21       | Dunner et al., 2020     | 1      | female         | 61                   | Chronic major depressive disorder                                                | nasal esketamine (28–56 mg)  | tranylcypromine 60 mg                                          | BP increases, but not to the extent of hypertension                                                                                                                                                                                                                 |
| 22       | Wang & Swainson, 2020   | 2<br>1 | female<br>male | 51, 70<br>57         | TRD in major depressive disorder, bipolar disorder                               | ketamine 0,5 mg/kg IV        | phenelzine 45 - 105 mg                                         | Statistically significant systolic BP increases, which were transient and clinically insignificant                                                                                                                                                                  |
| 19       | Bottemanne et al., 2020 | 3      | not disclosed  | 56, 19, 40           | TRD in major depressive disorder, bipolar disorder                               | ketamine 0,5 – 0,75 mg/kg IV | phenelzine 45 mg                                               | No hemodynamic changes                                                                                                                                                                                                                                              |

Ref. No.= reference number, MAOI = monoamine oxidase inhibitors, IV= intravenous, TRD = Treatment resistant depression, BP = Blood pressure.

**Table 2** Descriptive statistics of individual esketamine doses. Characteristics and potential confounders stratified by medication status of tranylcypromine at the time of esketamine administration

|                                               | TCP+              | TCP-          | p-value            |
|-----------------------------------------------|-------------------|---------------|--------------------|
| N (%)                                         |                   |               |                    |
| Sex                                           |                   |               | .364 <sup>a</sup>  |
| Female                                        | 38 (46.3)         | 174 (40.9)    |                    |
| Male                                          | 44 (53.7)         | 251 (59.1)    |                    |
| Hypertension                                  |                   |               | <.001 <sup>a</sup> |
| Yes                                           | 26 (31.7)         | 275 (64.7)    |                    |
| No                                            | 56 (68.3)         | 150 (35.3)    |                    |
| On antihypertensive Medication                | 26 (31.7)         | 284 (66.8)    | <.001 <sup>a</sup> |
| Mean (SD)                                     |                   |               |                    |
| Age                                           | 58.43 (14.52)     | 45.19 (16.0)  | <.001 <sup>b</sup> |
| BMI                                           | 27.41 (4.96)      | 25.18 (4.36)  | <.001 <sup>b</sup> |
| Serum creatinine                              | 101.28<br>(20.07) | 81.10 (17.90) | <.001 <sup>b</sup> |
| Number of antihypertensive drugs <sup>c</sup> | 2.09 (0.86)       | 1.49 (0.68)   | <.001 <sup>b</sup> |

TCP+ = Taking tranylcypromine, TCP- = Not taking tranylcypromine. BMI = Body mass index <sup>a</sup> p-values were calculated using chi-squared tests. <sup>b</sup> p-values were calculated using independent sample t-tests. <sup>c</sup> for those receiving antihypertensive medication.

**Table 3** Results of the sensitivity analysis on substituted baseline measures

| Parameter         | F-value        | p-value |
|-------------------|----------------|---------|
| ΔBPsys            | F(1,481)=66.44 | <.001   |
| ΔBPdia            | F(1,481)=42.02 | <.001   |
| ΔHR               | F(1,430)=1.19  | .277    |
| Mean BP systolic  | F(1,481)=31.08 | <.001   |
| Mean BP diastolic | F(1,481)=8.35  | .004    |
| Mean HR           | F(1,430)=1.70  | .193    |

Sensitivity analysis comparing cardiovascular parameters (mean change in systolic blood pressure (ΔBPsys), diastolic blood pressure (ΔBPdia) and heart rate (ΔHR) and mean absolute BP and HR) during esketamine administration between patients receiving (TCP+) or not receiving (TCP-) tranylcypromine in cases without substituted baseline values. P-values were calculated using ANCOVAs controlling for creatinine and age.

**Table 4** Results of the sensitivity analysis of the subgroup of patients with cases for TCP+ and TCP-

| Parameter         | F-value         | p-value |
|-------------------|-----------------|---------|
| ΔBPsys            | F(1,371)=101.02 | <.001   |
| ΔBPdia            | F(1,371)=54.11  | <.001   |
| ΔHR               | F(1,335)=0.04   | .844    |
| Mean BP systolic  | F(1,371)=54.91  | <.001   |
| Mean BP diastolic | F(1,371)=7.50   | .006    |

Mean HR

F(1,335)=0.30

.587

---

Sensitivity analysis comparing cardiovascular parameters (mean change in systolic blood pressure ( $\Delta$ BP<sub>sys</sub>), diastolic blood pressure ( $\Delta$ BP<sub>dia</sub>) and heart rate ( $\Delta$ HR) and mean absolute BP and HR) during esketamine administration between patients receiving (TCP+) or not receiving (TCP-) tranylcypromine in cases without changes in TCP medication status. P-values were calculated using ANCOVAs controlling for creatinine and age.
